# Supplementary material for: Acerihabitans arcticus sp. nov., a first psychrophilic member of the family Pectobacteriaceae and able to reduce Fe(III)
Source: Research Square preprint supplement (doi:10.21203/rs.3.rs-7027023/v1), 2025-10-17
Supplement: Supplementary file 1 [file b439731bf43deacd7aeb3898.docx]

*Acerihabitans arcticus* sp. nov., a first psychrophilic member of the family *Pectobacteriaceae* and able to reduce Fe(III)

Anastasiya G. Zakharyuk*, Vladimir E. Trubitsyn, Natalia E. Suzina, Dmitry S. Kopitsyn, Aleksandra A. Kuchierskaya, Oleg I. Melnikov & Viktoria A. Shcherbakova

***Correspondence:** Anastasiya Zakharyuk, kuran82@ mail.ru

**Table S1.** Comparative genomic characteristics between strain TG2T and closely described species

| **Strains** | **1** | **2** | **3** | **4** |
| --- | --- | --- | --- | --- |
| Genome size (Mbp) | 5.3 | 5.6 | 6.4 | 4.3 |
| Number of contigs | 108 | 59 | 1 | 32 |
| Contig N50 | 150.9 kb | 279.1kb | 6.4 Mb | 391.8 kb |
| Total genes | 4,950 | 5,170 | 5,820 | 4,012 |
| Protein-coding genes | 4,734 | 4,969 | 5,500 | 3,916 |
| DNA G + C content (mol%, genome data) | 51.1 | 57.0 | 55.0 | 54.0 |

Taxa: 1, Strain TG2T; 2, *Acerihabitans arboris* SAP-6T; 3, *Sodalis ligni* dw23T; 4, *Biostraticola tofi* DSM 19580T. All data from NCBI GenBank, [https://www.ncbi.nlm.nih.gov/datasets/genome/](https://www.ncbi.nlm.nih.gov/datasets/genome/?taxon=133)
